# Supplementary material
Source: PubMed Central journal article supplement (PMC11027702)
Supplement: 262_2020_2564_MOESM1_ESM.pdf [file 262_2020_2564_MOESM1_ESM.pdf]

**Table S1 More detailed sequence information of the variable regions of all identified HLA/HCMV specific Fab antibodies as gathered from IMGT/V-QUEST. The complete sequences of all 10 Fabs are available from NCBI's Genbank (see Table S2).**

| Fab           | productive IGH rearranged sequence |          |                 |                      | productive IGL rearranged sequence |                 |                  |  |
|---------------|------------------------------------|----------|-----------------|----------------------|------------------------------------|-----------------|------------------|--|
|               | V-Gene homology                    | D-Gene   | J-Gene homology | AA Junction          | V-Gene homology                    | J-Gene homology | AA Junction      |  |
| <b>A*0101</b> |                                    |          |                 |                      |                                    |                 |                  |  |
| A6            | IGHV1-46*01 / 98,6%                | D2-2     | J3*02 / 92,0 %  | CARNGYCSSTSCYDADFIIW | IGLV2-11*01/94,1%                  | J3*02 / 86,1%   | CCSYAGSSSWVF     |  |
| F3            | IGHV1-46*01/ 99,7%                 | D1-20    | J4*02 / 76,6 %  | CASGITGAHDYVW        | IGLV1-40*02/97,9%                  | J3*02 / 100%    | CQSYDNSLSGPNWWVF |  |
| <b>A*0201</b> |                                    |          |                 |                      |                                    |                 |                  |  |
| A9            | IGHV1-18*01 / 95,1%                | D1-26    | J6*02 / 75,8 %  | CARDFGKWDLPMYGMDVW   | IGLV1-51*01/92,6%                  | J1*01 / 91,9%   | CGTWNINILSAVVF   |  |
| A11           | IGHV1-18*01 / 95,8%                | D1-26    | J6*02 / 77,4 %  | CARDFGKWDLPMYGMDVW   | IGLV3-21*01/90,3%                  | J1*01 / 91,7%   | CQVWDDRRRDHYVF   |  |
| C1            | IGHV1-69*12/ 99,6%                 | D6-13    | J4*02/100%      | CARGLAAPDYFDVW       | IGLV1-40*02/100%                   | J1*01/100%      | CQSYDSSLSGPFVVF  |  |
| <b>A*2402</b> |                                    |          |                 |                      |                                    |                 |                  |  |
| C12/2         | IGHV2-5*02 / 98,3%                 | D6-13    | J4*02 / 97,4%   | CARMTTSSGSWVSFYFDVW  | IGKV3-11*01 / 93,9%                | J2*01 / 91,4%   | CQHRRTF          |  |
| <b>B*0702</b> |                                    |          |                 |                      |                                    |                 |                  |  |
| C7            | IGHV1-46*01 / 98,3%                | D1-14*01 | J6*02 / 76,4%   | CARYIGIMDVW          | IGKV3-20*01 / 97,5 %               | J3*01 / 100%    | CQQYGS SPLTF     |  |
| D10           | IGHV3-30*03 / 96,5%                | D6-19    | J4*02/89,5%     | CARARIGIVSGTLVFDVW   | IGKV3-20*01 / 98,2 %               | J5*01 / 84,2 %  | CQQYGS SPGTF     |  |
| <b>B*0801</b> |                                    |          |                 |                      |                                    |                 |                  |  |
| 2A2           | IGHV1-2*02/97,6%                   | D4-23*01 | JH4*02/79,2%    | CAREMGYGKSEFDVW      | IGLV3-21*03 / 94,6%                | J2or3*01 /86,5% | CQVWVDYSSDHVIF   |  |
| <b>B*3501</b> |                                    |          |                 |                      |                                    |                 |                  |  |
| C5            | IGHV1-8*02 / 94,1%                 | D3-3*01  | J5*02 / 82,4%   | CARQGRILRFLEWVMDPPW  | IGKV2-28*01 / 96,9%                | J2*01/100%      | CMQIGLQTPYTF     |  |

**Table S2 GenBank accession numbers of heavy and light chain variable regions of all identified TCR-like FABs. In the left column the names of selected FAB clones are given and whether the sequence describes the variable heavy (IGHV) or variable light (IGLV) chain.**

| <b><i>FAB ID</i></b> | <b><i>GenBank accession numbers</i></b> |          |
|----------------------|-----------------------------------------|----------|
| A6 IGHV              | BankIt2156396 Seq1                      | MK050824 |
| A6 IGLV              | BankIt2156396 Seq2                      | MK050825 |
| F3 IGHV              | BankIt2156396 Seq3                      | MK050826 |
| F3 IGLV              | BankIt2156396 Seq4                      | MK050827 |
| A9 IGHV              | BankIt2156396 Seq5                      | MK050828 |
| A9 IGLV              | BankIt2156396 Seq6                      | MK050829 |
| A11 IGHV             | BankIt2156396 Seq7                      | MK050830 |
| A11 IGLV             | BankIt2156396 Seq8                      | MK050831 |
| C1 IGHV              | BankIt2156396 Seq9                      | MK050832 |
| C1 IGLV              | BankIt2156396 Seq10                     | MK050833 |
| C12.2 IGHV           | BankIt2156396 Seq11                     | MK050834 |
| C12.2 IGLV           | BankIt2156396 Seq12                     | MK050835 |
| C7 IGHV              | BankIt2156396 Seq13                     | MK050836 |
| C7 IGLV              | BankIt2156396 Seq14                     | MK050837 |
| D10 IGHV             | BankIt2156396 Seq15                     | MK050838 |
| D10 IGLV             | BankIt2156396 Seq16                     | MK050839 |
| 2A2 IGHV             | BankIt2156396 Seq17                     | MK050840 |
| 2A2 IGLV             | BankIt2156396 Seq18                     | MK050841 |
| C5 IGHV              | BankIt2156396 Seq19                     | MK050842 |
| C5 IGLV              | BankIt2156396 Seq20                     | MK050843 |

**Table S3 Amino acid sequence and originating antigen of the control-peptides used in this study.**

|                          | <b><i>Aa sequence</i></b> | <b><i>Originating antigen</i></b>                |
|--------------------------|---------------------------|--------------------------------------------------|
| <b><i>peptide 1</i></b>  | DTDHYFLRY                 | CGI-06 protein                                   |
| <b><i>peptide 2</i></b>  | VLYDRVLY                  | SRP68                                            |
| <b><i>peptide 3</i></b>  | KIADRFLLY                 | LIM domain-only protein 4                        |
| <b><i>peptide 4</i></b>  | KFIDTTSKF                 | Ribosomal protein L3                             |
| <b><i>peptide 5</i></b>  | TYGEIFEKF                 | NADH dehydrogenase                               |
| <b><i>peptide 6</i></b>  | IPNEIIHAL                 | hnRNP M                                          |
| <b><i>peptide 7</i></b>  | MPRGVVVTL                 | E3 ubiquitin-protein ligase HECTD1               |
| <b><i>peptide 8</i></b>  | NLKLKHTF                  | Histone-binding protein RBBP7                    |
| <b><i>peptide 9</i></b>  | RVKGPGISKF                | Ectonucleoside triphosphate diphosphohydrolase 1 |
| <b><i>peptide 10</i></b> | LPHSSSHWL                 | Melanocyte protein PMEL                          |
| <b><i>peptide 11</i></b> | GILGFVFTL                 | Influenza A matrix protein                       |
| <b><i>peptide 12</i></b> | SLLMWITQV                 | NY-ESO-1                                         |
| <b><i>peptide 13</i></b> | TLEEFSAKL                 | Trypanosoma cruzi KMP-11                         |
| <b><i>peptide 14</i></b> | ELAGIGILTV                | Melan-A                                          |

**Table S4 Primary human skin fibroblast cell cultures.**

| <b><i>ID</i></b> | <b><i>HLA A and B alleles</i></b> |
|------------------|-----------------------------------|
| Fibro1           | A*0201, B*0702                    |
| Fibro2           | A*0101, A*0201, B*0801, B*3501    |
| Fibro3           | A*0301, A*2402, B*0702, B*3801    |
| Fibro4           | A*03, A*11, B*07, B*15            |
| Fibro5           | A*0201, A*2501, B*0801, B*4001    |
| Fibro6           | A*0201, A*0301, B*3501, B*4402    |
| Fibro7           | A*0301, A*3303, B*0702, B*3901    |
| Fibro8           | A*0101, A*0301, B*0702, B*3503    |
| Fibro9           | A*0201, A*0301, B*3501, B*2705    |
| Fibro10          | A*0301, A*2402, B*3501, B*5501    |
| Fibro11          | A*0101, A*2402, B*1801, B*5701    |

**Table S5 Association and dissociation rate constants and dissociation constants of A6, C1 and C7.**

| Fabs | ka                 | kd                    | KD                   |
|------|--------------------|-----------------------|----------------------|
| A6   | $7.78 \times 10^4$ | $5.89 \times 10^{-4}$ | $7.6 \times 10^{-9}$ |
| C1   | $4.63 \times 10^4$ | $2.99 \times 10^{-2}$ | $6.6 \times 10^{-7}$ |
| C7   | $1.01 \times 10^4$ | $1.94 \times 10^{-2}$ | $1.9 \times 10^{-6}$ |

**a**

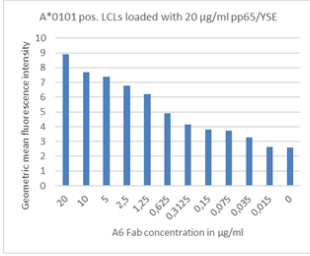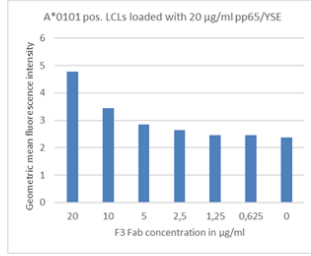

**b**

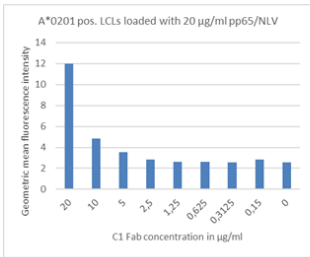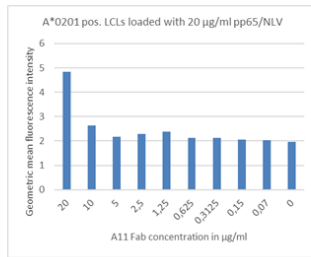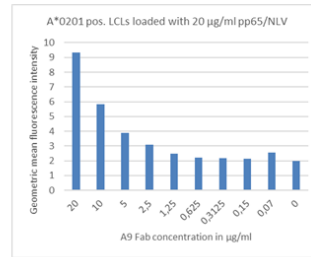

**c**

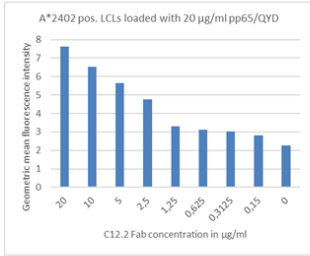

**d**

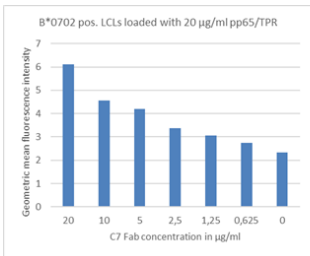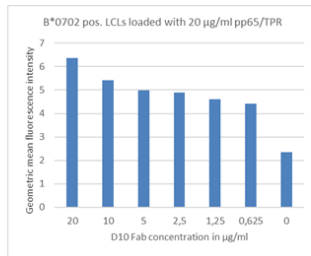

**e**

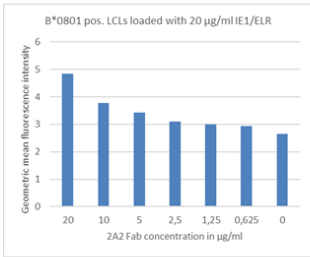

**f**

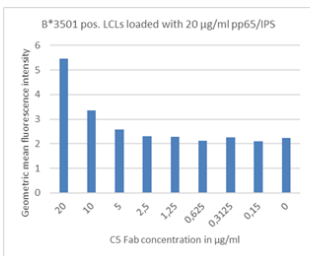

**Figure S1 Fab antibody titration.**

Titration of the concentration of all 10 Fab antibodies (x-axis) is shown in flow cytometry staining experiments of HCMV-peptide loaded LCLs and measured by the geometric mean fluorescence intensity (y-axis). LCLs of different HLA alleles were constantly loaded with 20  $\mu\text{g/ml}$  of their respective HCMV-peptide. HCMV-peptide-loaded LCLs were then stained with HLA-matching, HCMV-specific Fab antibodies in decreasing concentration from 20  $\mu\text{g/ml}$  to 0  $\mu\text{g/ml}$ . **a)** displays the HLA A\*0101 restricted, HCMV-specific Fab clones A6 and F3 in diluted concentrations on A\*0101 positive LCLs loaded with the HCMV-peptide YSE (derived from pp65). Binding of A6 can be detected at concentrations of < 1  $\mu\text{g/ml}$  whereas F3 starts to show binding to HCMV-peptide loaded LCLs at concentrations of 10  $\mu\text{g/ml}$ . **In b)** the A\*0201 restricted HCMV Fab clones C1, A11 and A9 are tested for binding to HLA A\*0201 positive LCLs (loaded with 20  $\mu\text{g/ml}$  of the pp65-derived HCMV peptide NLV) in different concentrations. A9, C1 and A11 begin to bind to HLA-matching LCLs at concentrations of 5  $\mu\text{g/ml}$ , 10  $\mu\text{g/ml}$  and 20  $\mu\text{g/ml}$ , respectively. **c)** illustrates corresponding Fab titrations for the clone C12.2 (HLA\*A2402 restricted, LCLs pulsed with QYD of pp65). C12.2 concentrations can be halved down to 2.5  $\mu\text{g/ml}$  while still showing binding to LCLs. **d)** C7 and D10 concentrations (both HLA\*B0702 restricted, LCLs pulsed with TPR of pp65) can be diluted to 5 and 0.625  $\mu\text{g/ml}$  maintaining binding capacity to HCMV-peptide pulsed LCLs. **e) and f)** 2A2 (HLA\*B0801 restricted, LCLs pulsed with ELR of IE1) and C5 (HLA\*B3501 restricted, LCLs pulsed with IPS of pp65) demonstrate relevant binding to peptide-pulsed LCLs only at 20  $\mu\text{g/ml}$ .

**a**

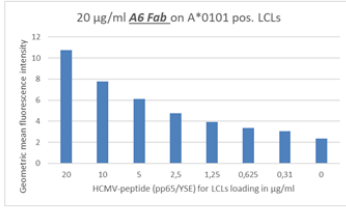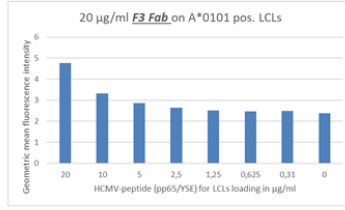

**b**

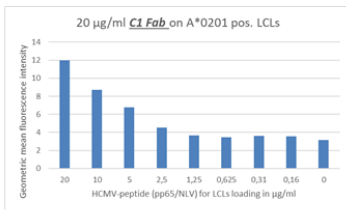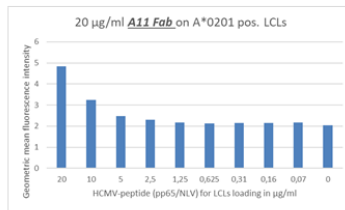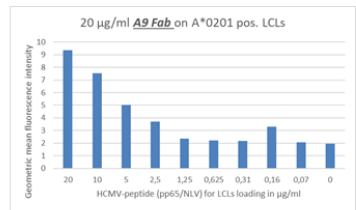

**c**

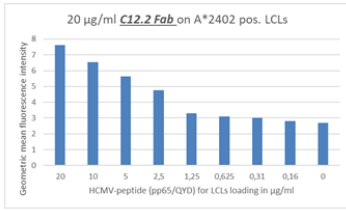

**d**

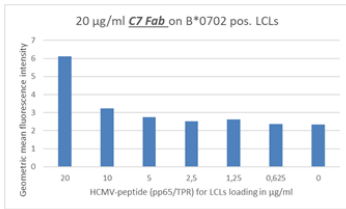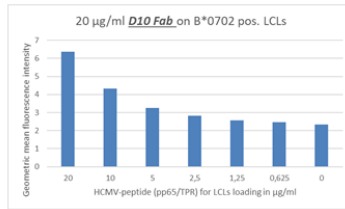

**e**

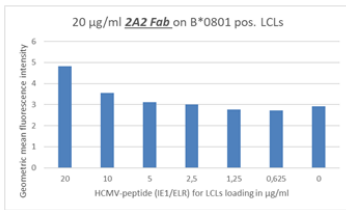

**f**

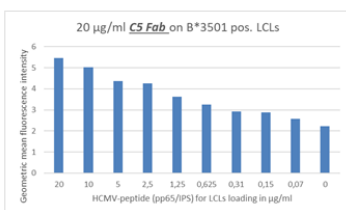



**Figure S2 HCMV-peptide titration.**

Flow cytometry with assessment of the geometric mean fluorescence intensity (y-axis) was used for HCMV-peptide titration experiments. Concentrations of Fab clones used for LCL staining were held constant at 20 µg/ml. LCLs expressing different HLA I alleles were loaded with corresponding HCMV-peptides (Table 1) at decreasing concentrations starting from 20 µg/ml (x-axis). **a)** shows the binding intensity of the A\*0101 restricted, HCMV specific Fabs A6 and F3 to LCLs pulsed with decreasing concentrations of the pp65-derived peptide YSE. For A6, peptide loading of LCLs with 2,5 µg/ml YSE seems to be sufficient to show binding whereas for F3, HCMV-peptide pulsing with more than 10 µg/ml is required to show its binding to LCLs. **b)** Down to 5 µg/ml of the pp65-derived HCMV-peptide NLV is needed for peptide-pulsing in order to show binding capacity of the A\*0201 restricted, HCMV specific Fabs C1 and A9 to A\*0201 expressing LCLs. When staining with A11, peptide-pulsing of LCLs with more than 10 µg/ml of NLV is required to detect binding. **c)** C12.2 Fab staining of A\*2402 positive LCLs loaded with different concentrations of the HCMV-peptide QYD (derived from pp65). **d)** C7 and D10 Fab staining of B\*0702 expressing LCLs loaded with the pp65-derived HCMV-peptide TPR. For positive LCL staining with the Fabs C7 and D10 HCMV-peptide concentrations of >10 µg/ml and 5 – 10 µg/ml, respectively, are required. **e)** 2A2 Fab staining (20 µg/ml) of B\*0801 positive LCLs loaded with different concentrations of the HCMV-peptide ELR (derived from IE1) is illustrated. **f)** B\*3501 positive LCLs can be stained with the Fab clone C5 when LCLs are loaded with the HCMV-peptide IPS (derived from pp65) starting at peptide concentrations of approximately 2.5 µg/ml.

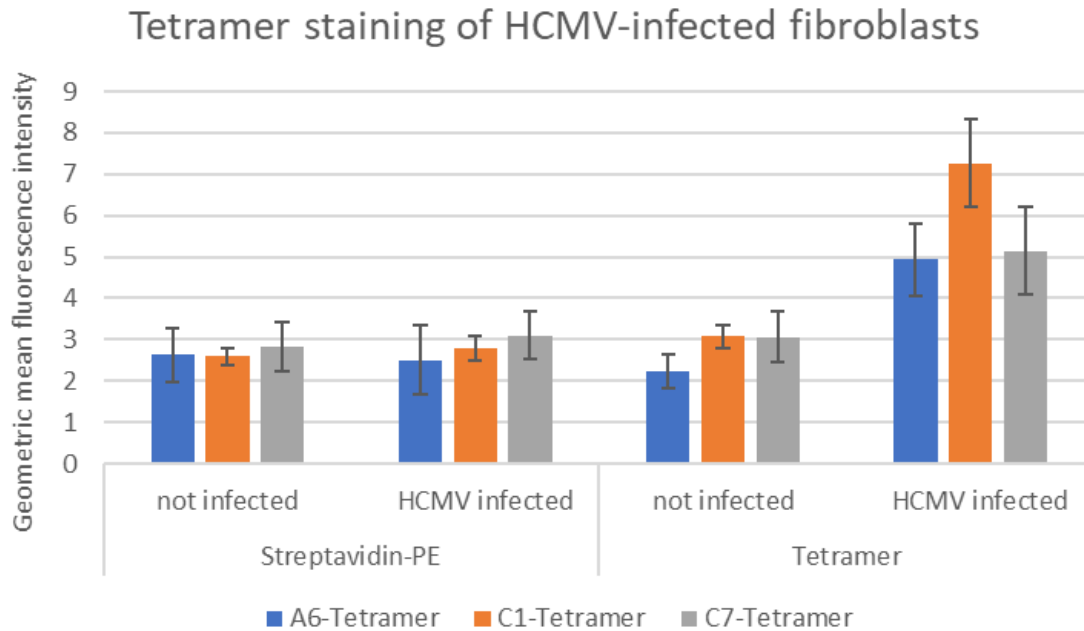

**Figure S3 Tetramer staining of HCMV-infected primary fibroblasts.**

HCMV-infected fibroblasts expressing different HLA alleles were incubated with tetramers of the HLA/HCMV-specific Fabs A6 (A\*0101 restricted), C1 (A\*0201 restricted) and C7 (B\*0702 restricted). Staining intensity as assessed by flow cytometry was measured using the geometric mean fluorescence intensity which is plotted on the y-axis. Staining experiments were performed 3 – 5 days after HCMV infection. Blue columns show the mean of 4 technical repeats of staining experiments with the A6-tetramer on HCMV-infected cells of Fibro2 and Fibro11. Orange columns represent the mean of 14 C1-tetramer staining experiments on cells of Fibro2, Fibro5, Fibro6, Fibro9 and MRC-5. Grey columns show the mean of 6 repeats of the C7-tetramer on Fibro4 and Fibro7. Bars indicate standard errors. As control, tetramer staining was performed on uninfected cells and with streptavidin-PE alone.

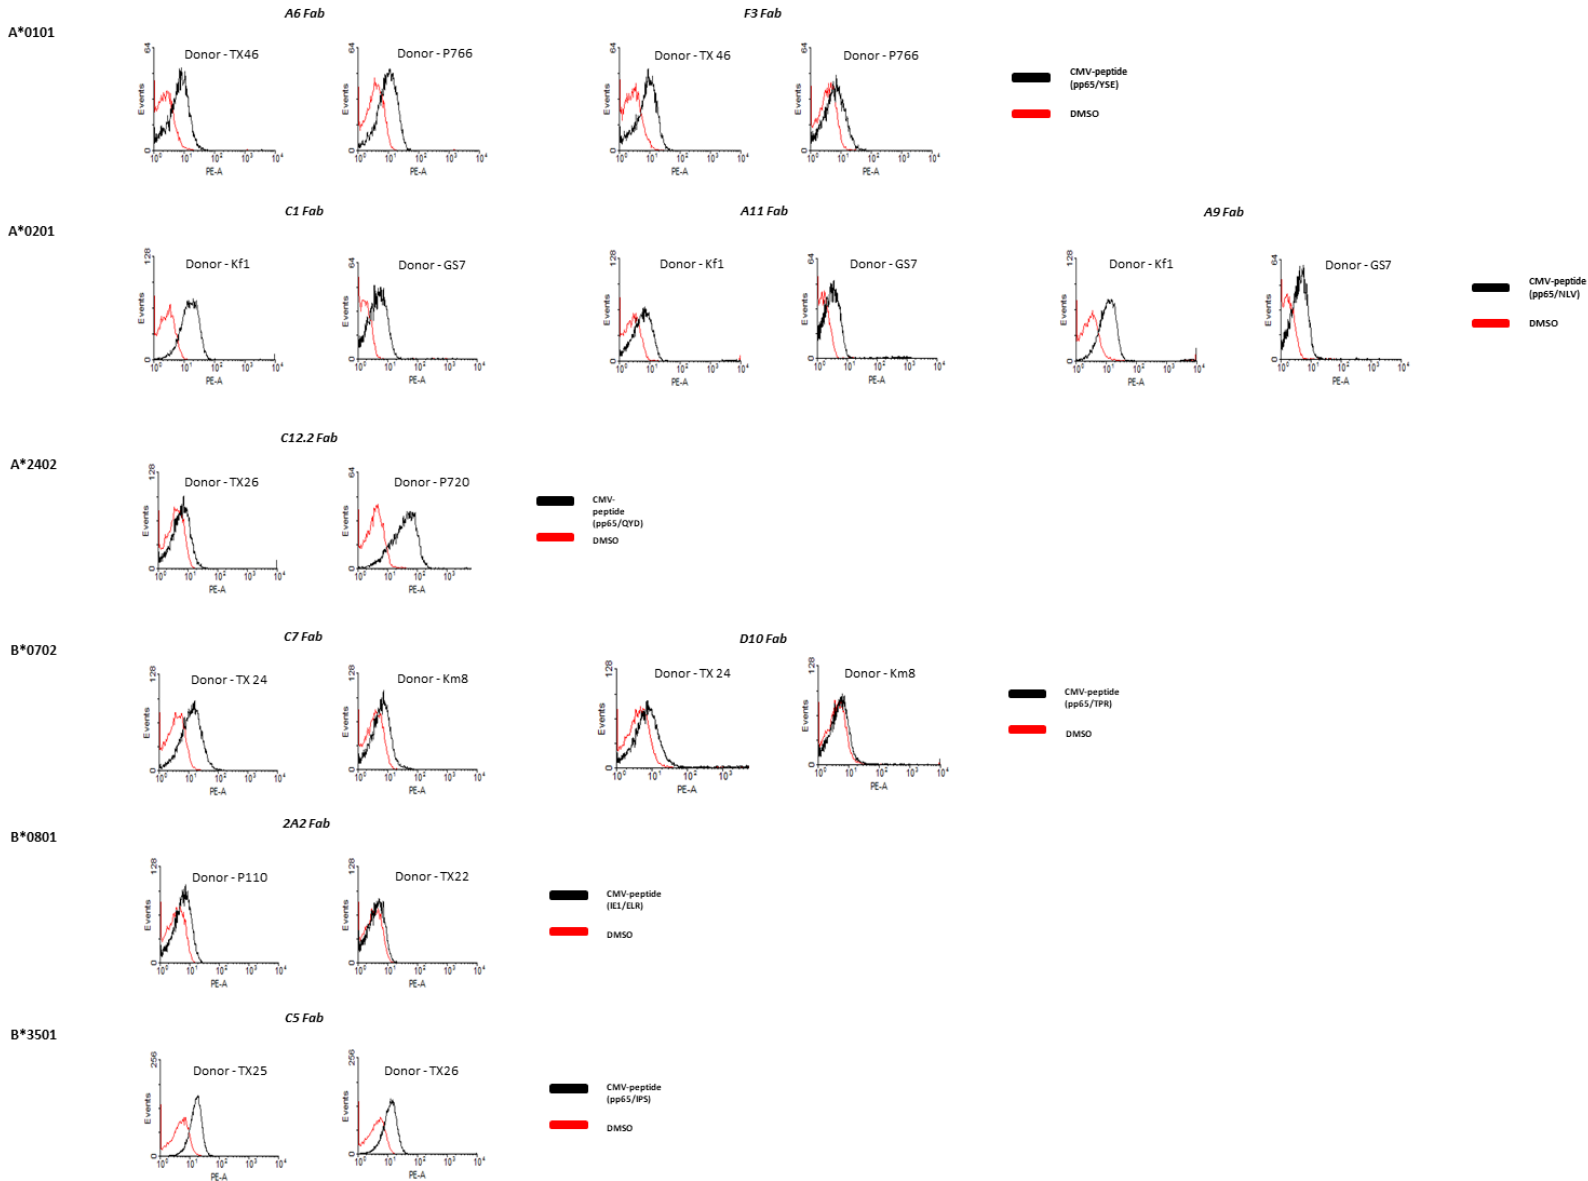

### Figure S4 Interpatient variability.

In order to show the ability of our TCR-like, HCMV-specific Fab antibodies to bind to the lymphocytes of different donors of the same HLA I type, i.e. to exclude relevant interpatient variability, we loaded peripheral blood of 2 donors expressing the same HLA I allele with HCMV peptides (20  $\mu\text{g/ml}$ ) and tested all identified TCR-like, HCMV-specific Fabs (50 $\mu\text{g/ml}$ ) for binding by flow cytometry. All Fabs are assorted by their HLA I restriction and respective HCMV-peptides used for lymphocyte-pulsing are given as 3-letter code (see table S3). In summary, all selected HCMV-specific TCR-like Fabs showed binding to HCMV-peptide loaded lymphocytes of different donors expressing the same HLA I allele. For most Fabs, some difference in binding affinity was detected, but their general ability to bind to HCMV-peptide-loaded lymphocytes of matching HLA I-status was maintained.

**a** C1-ETA' staining on HCMV-peptide loaded MRC-5 fibroblasts  
 Secondary system C1-ETA' (50 µg/ml) + secondary system

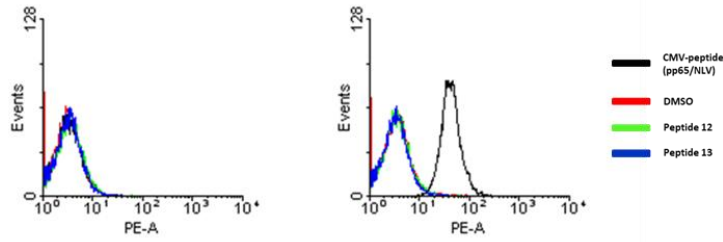

**b** C1-ETA' staining of HCMV-peptide loaded MRC-5 cells ± IFN $\gamma$

Without IFN $\gamma$  2x 160 U IFN $\gamma$  over 48h

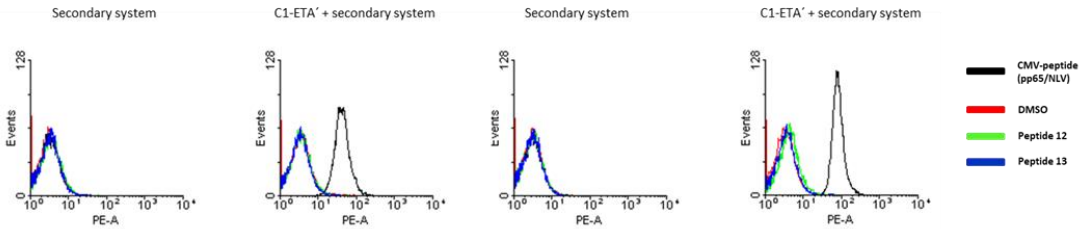

**c** Cytotoxicity of C1-ETA' on HCMV-peptide loaded MRC-5 fibroblasts

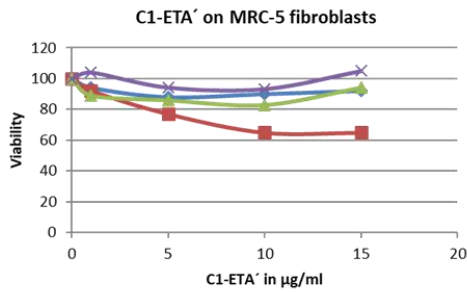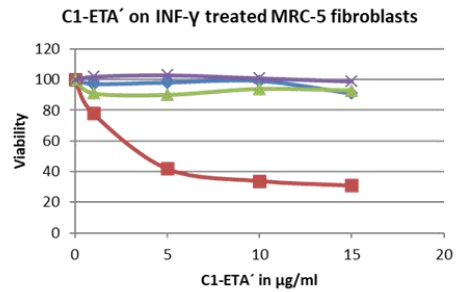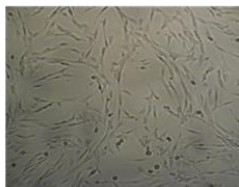

— DMSO  
 — 50 µg/ml HCMV-peptide (pp65/NLV)  
 — 50 µg/ml peptide 12  
 — 50 µg/ml peptide 13

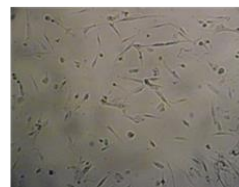

— DMSO  
 — 50 µg/ml HCMV-peptide (pp65/NLV)  
 — 50 µg/ml peptide 12  
 — 50 µg/ml peptide 13

**Figure S5 Effects of Interferon gamma (IFN $\gamma$ ) on HCMV-peptide loaded MRC-5 cells.**

MRC-5 fibroblasts can be infected with HCMV similar to primary fibroblasts and express the HLA I allele A\*0201. The HLA A\*0201-restricted, HCMV-specific Fab antibody C1, coupled to *Pseudomonas* Exotoxin A (C1-ETA'), was tested for binding to HCMV-peptide loaded MRC-5 cells. For staining experiments MRC-5 cells were pulsed with the pp65-derived HCMV-peptide NLV (see table 1) at 50  $\mu$ g/ml. For cytotoxicity assays of C1-ETA', MRC-5 fibroblasts were loaded with 50  $\mu$ g/ml HCMV-peptide NLV. **(a)** When loaded with 50  $\mu$ g/ml HCMV-peptide (pp65/NLV), MRC-5 cells can be specifically stained with the HLA A\*0201-restricted, HCMV-specific Fab antibody C1, that is coupled to *Pseudomonas* Exotoxin A. When loaded with control peptides (Table S3) C1-ETA' does not bind to MRC-5 cells. **(b)** Stimulation of MRC-5 fibroblasts with Interferon gamma (2 x 160 U over 48h) did only minimally improve the affinity of C1-ETA' to HCMV-peptide loaded MRC-5 cells. **(c)** For cytotoxicity assays, MRC-5 fibroblasts were either loaded with 50  $\mu$ g/ml HCMV-peptide (pp65/NLV) or the same amount of control peptides and subsequently incubated with C1-ETA' in increasing concentration from 1  $\mu$ g/ml to 15  $\mu$ g/ml. Viability was assessed using alamarBlue™ as described in material and methods. Without the addition of Interferon gamma (2 x 160 U in 48h) the cytotoxic effects of C1-ETA' on HCMV-peptide loaded MRC-5 fibroblasts is weak. After adding Interferon gamma 2 times over 48 hours prior to cytotoxicity assays, C1-ETA' shows potent cytotoxic effects against HCMV-peptide pulsed MRC-5 cells. We speculate that Interferon gamma leads to increased internalization of HLA complexes since binding of C1-ETA' to HCMV-peptide loaded MRC-5 fibroblasts is not influenced by Interferon gamma as shown in (B).

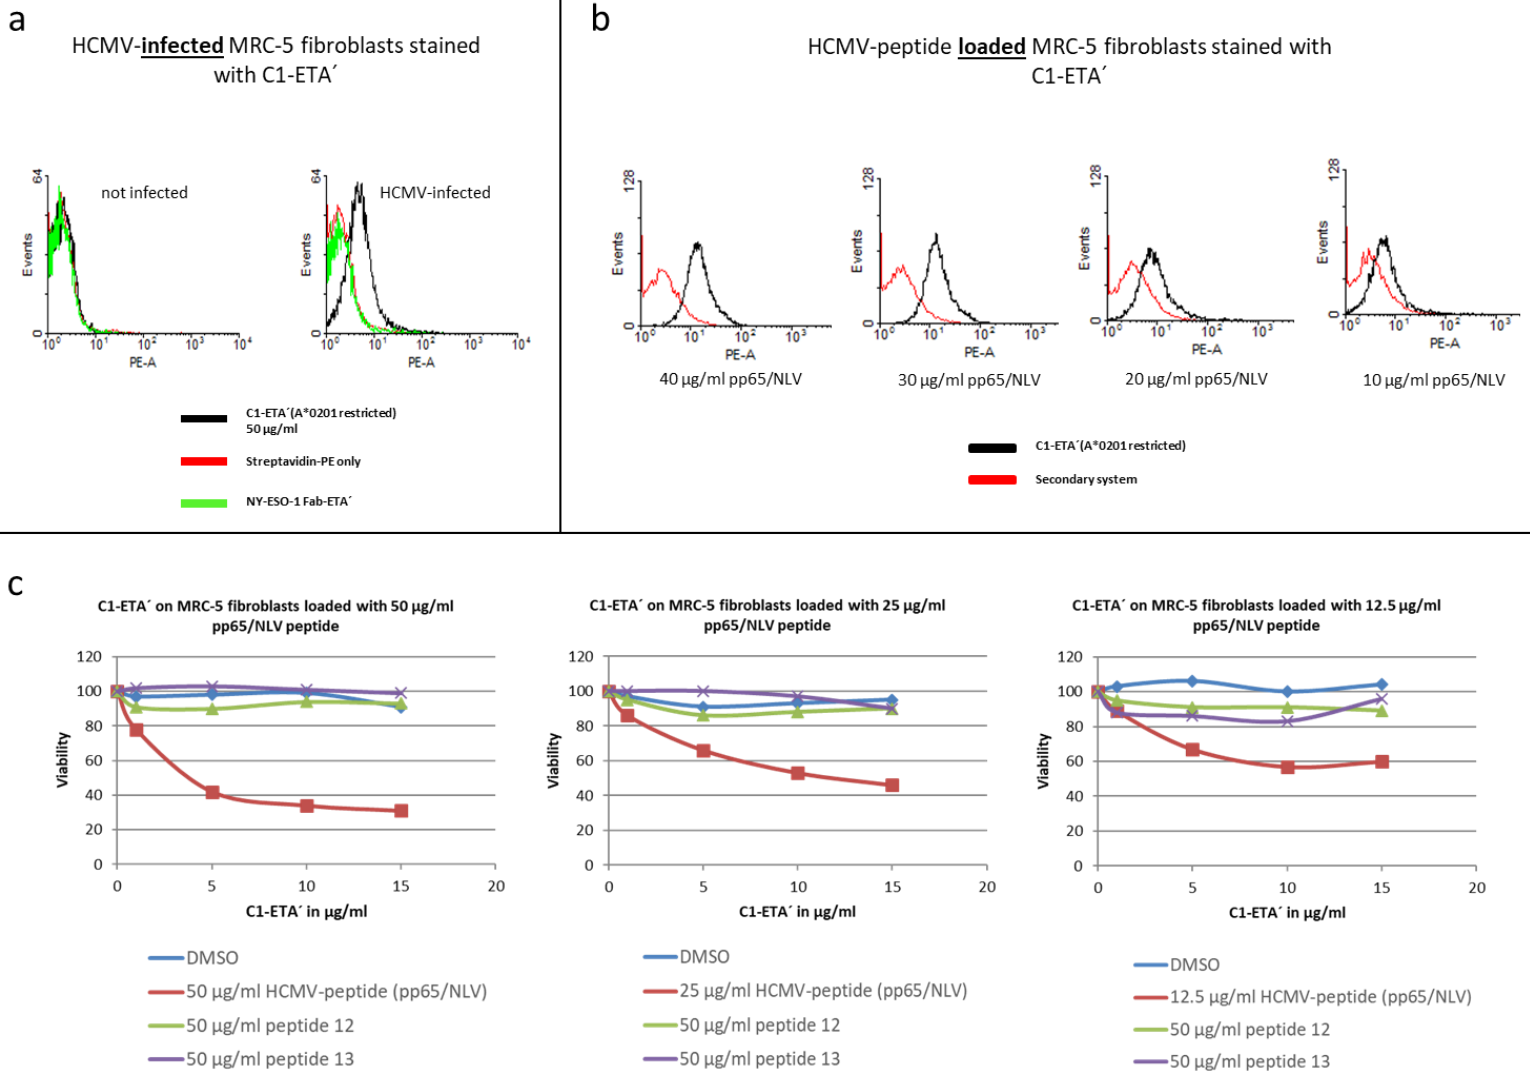

### Figure S6 MRC-5 fibroblast cell line experiments.

In figure 4, we demonstrate the ability of 3 different ETA' conjugated HLA I-restricted and HCMV-specific Fabs to kill HCMV-peptide loaded cell lines expressing different HLA I alleles providing proof of concept results for respective Fabs as therapeutic options in the treatment of HCMV infected cells. In order to generate a more realistic test setting we used the fibroblast cell line MRC-5. After infection with the HCMV strain AD169 (MOI 0.5-1.0), we were able to show binding of the ETA'-conjugated, A\*0201 restricted and HCMV specific Fab antibody C1 specifically to infected MRC-5 cells and not to uninfected MRC-5 cells (**a**). To determine the amount of HCMV-peptide presented on the surface of HCMV-infected MRC-5 cells we performed HCMV-peptide titration experiments and found comparable staining intensities for MRC-5 cells loaded with 10 – 20 µg/ml HCMV-peptide as for HCMV-infected MRC-5 cells (**b**). When incubated with MRC-5 cells that were loaded with HCMV-peptide at 12.5 µg/ml, C1-ETA' still was able to exert cytotoxic effects, demonstrating its ability to be effective even when the target peptide is presented only in low concentrations mimicking HCMV-infection (**c**). When loaded with higher HCMV-peptide concentrations the cytotoxic effects of C1-ETA' on MRC-5 cells increase (**c**).

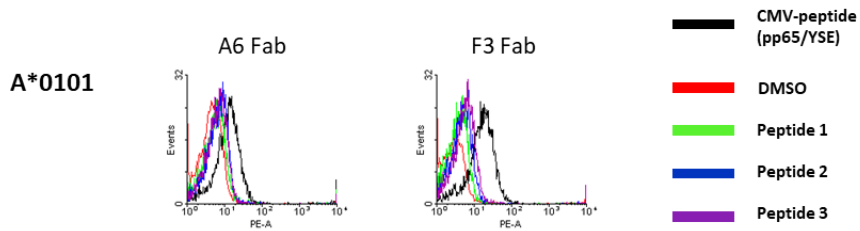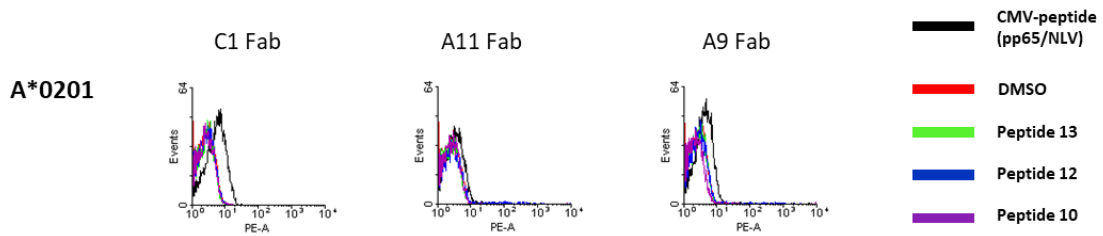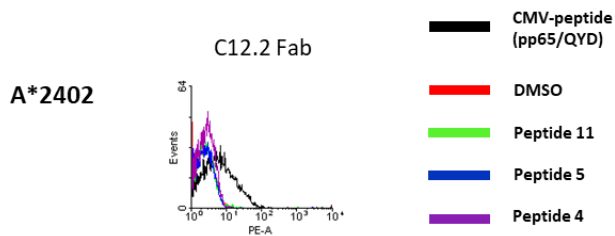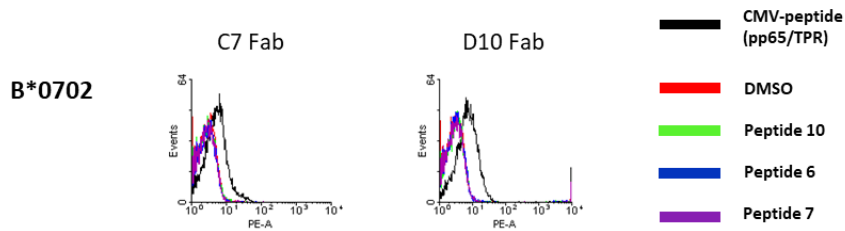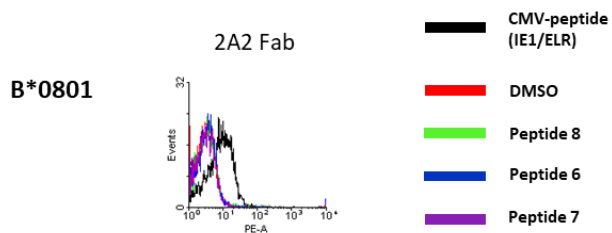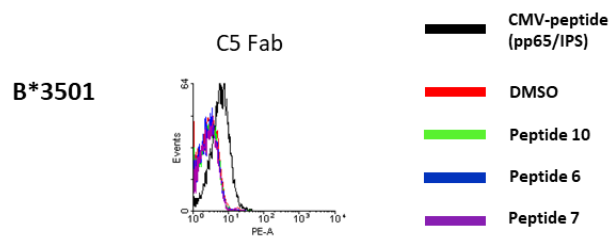

**Figure S7 Binding assay of HLA I/HCMV-peptide-specific Fabs on lymphocytes.**

EDTA blood from HLA-typed donors was pulsed with HCMV-peptides and three control-peptides after erythrocyte lysis. Staining experiments were done as described with LCLs using 20 µg/ml HCMV-peptides for lymphocyte pulsing and 50 µg/ml HLA I/HCMV-peptide-specific Fabs. Data analysis was done on gated lymphocytes. Histograms are assorted according to histograms in Figure 2 by HLA alleles. All HLA I/HCMV-peptide-specific Fab antibodies that showed binding to HCMV-peptide pulsed LCLs also bound to HCMV-peptide pulsed blood lymphocytes. Control-peptides used were the same as with LCLs in Figure 2. As compared to HCMV-peptide loaded pure LCLs, binding capacity to lymphocytes after staining of whole EDTA blood was weaker as measured by flowcytometry.



not infected

HCMV-infected

**A\*2402**  
fibroblasts  
of Fibro10

C12.2 tetramer

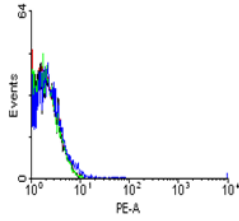

C12.2 tetramer

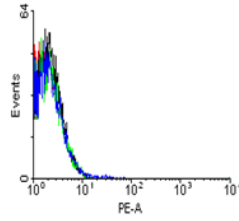

— C12.2 (A\*2402)  
Fab tetramer  
— Streptavidin  
only  
— C5 (B\*3501)  
Fab tetramer  
— C7 (B\*0702)  
Fab tetramer

**B\*0801**  
fibroblasts  
of Fibro2

2A2 tetramer

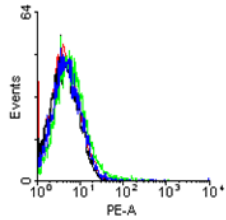

2A2 tetramer

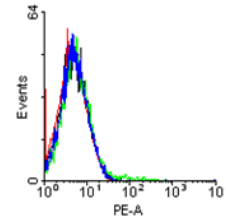

— 2A2 (B\*0801)  
Fab tetramer  
— Streptavidin  
only  
— NY-ESO-1 (A\*0201)  
Fab tetramer  
— C7 (B\*0702)  
Fab tetramer

**B\*3501**  
fibroblasts  
of Fibro10

C5 tetramer

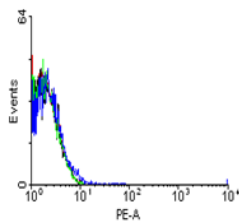

C5 tetramer

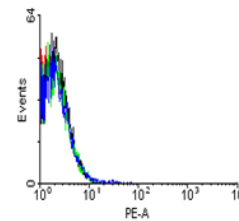

— C5 (B\*3501)  
Fab tetramer  
— Streptavidin  
only  
— C12.2 (A\*2402)  
Fab tetramer  
— C7 (B\*0702)  
Fab tetramer

**Figure S8 Negative binding assays of HLA I/HCMV-peptide-specific Fab tetramers to HCMV-infected fibroblasts.**

The HCMV-specific tetramerized Fabs C12.2, 2A2 and C5 that are restricted to the HLA alleles A\*2402, B\*0801 and B\*3501 showed no binding to either infected or uninfected fibroblasts with permissive HLA alleles. C12.2 (A\*2402) was tested on Fibro10 fibroblasts, 2A2 (B\*0801) was incubated with cells of Fibro2 and Fibro5 cell cultures and C5 (B\*3501) was tested on cells of the primary human skin fibroblast culture Fibro10. Different HCMV-specific, HLA I restricted tetramerized Fabs and the tetramerized NY-ESO-1 specific, HLA A\*0201 restricted Fab were used as controls (depicted and assorted by color on the right side).

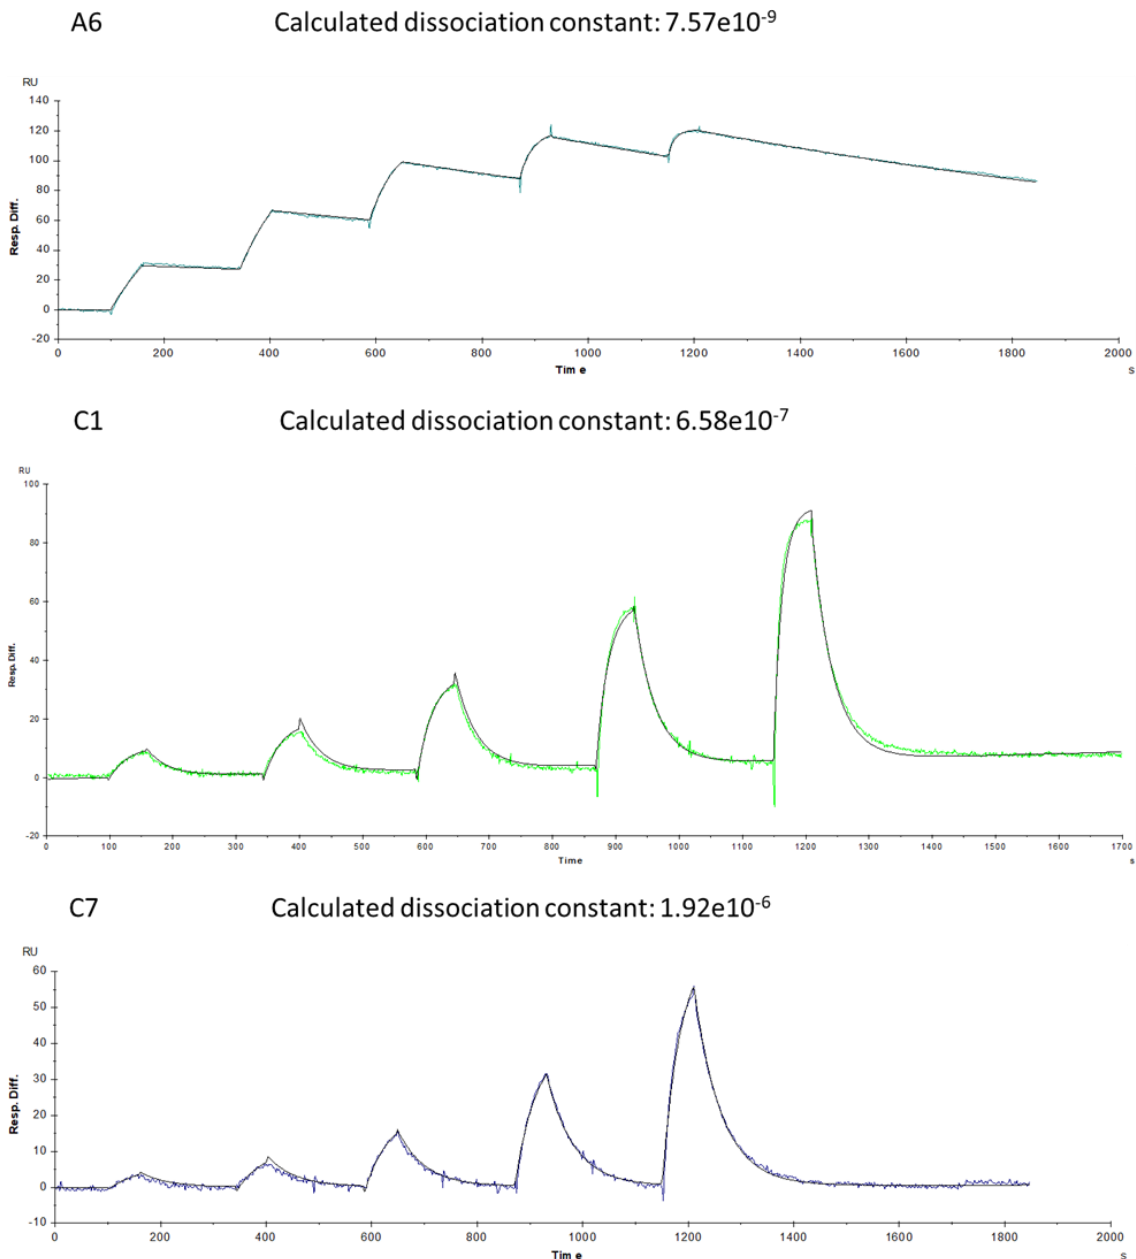

**Figure S9 Surface plasmon resonance imaging for affinity calculation of HCMV specific, TCR-like Fab antibodies.**

Biotinylated monomeric HLA-I/HCMV-peptide complexes (ligand) were immobilized on a streptavidin-coupled CM5 Chip. Fab antibodies (analyte) were injected in concentrations of 1.0  $\mu\text{M}$ , 0.5  $\mu\text{M}$ , 0.25  $\mu\text{M}$ , 0.125  $\mu\text{M}$  and 0.0625  $\mu\text{M}$ . The Fab antibodies A6, C1 and C7 were injected sequentially without regeneration using a single-cycle kinetics protocol. The HLA A\*0101 restricted, HCMV specific Fab antibody A6 showed a dissociation constant (KD) of  $7.57 \times 10^{-9}$ . For C1 a KD value of  $6.58 \times 10^{-7}$  was calculated. C7, the HLA B\*0702 restricted, HCMV specific Fab antibody, showed the lowest affinity with a dissociation constant of  $1.92 \times 10^{-6}$ .
